# Supplementary material for: Transcription Factor NRF2 Participates in Cell Cycle Progression at the Level of G1/S and Mitotic Checkpoints
Source: MDPI journal article supplement (doi:10.3390/antiox11050946), 2022-05-11
Supplement: s1 [file s1]

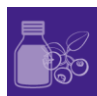

## Supplementary Materials

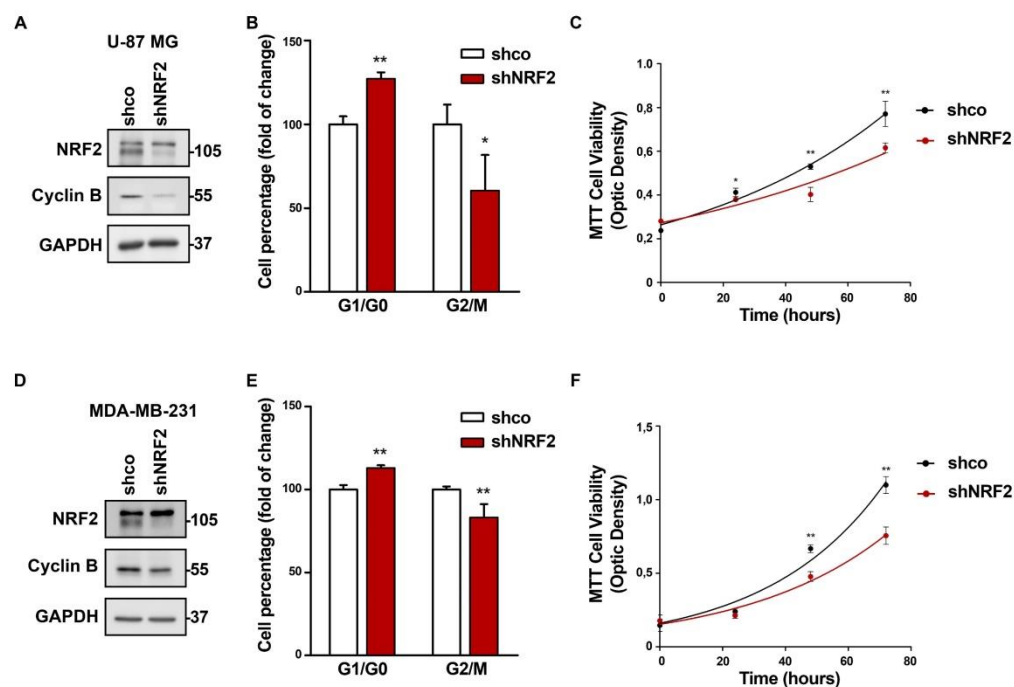

**Figure S1.** NRF2 increases G1/G0 cell fraction and reduces cell proliferation rate. (A–C) U-87 MG glioblastoma cells. (D–F) MDA-MB-231 breast adenocarcinoma cells. Both cell lines were transduced with lentiviral vectors containing control (shco) or shNRF2-1 (shNRF2). (A,D), Representative immunoblots of NRF2, Cyclin B, and GAPDH as a loading control. (B,E) Flow cytometry analysis of changes in cell cycle distribution in Hoechst-stained cells. Data are presented as mean  $\pm$  S.D. \*\*  $p \leq 0.01$ ; \*  $p \leq 0.05$  according to a Student's *t*-test ( $n = 3$ ). (C,F) Proliferation rate in shNRF2 cells based on MTT viability assay. The curve was fitted according to an exponential growth model with the least square fit. Data are presented as mean  $\pm$  S.D. \*\*  $p \leq 0.01$ ; \*  $p \leq 0.05$  vs. shco according to a two-way ANOVA test ( $n = 4$ ).

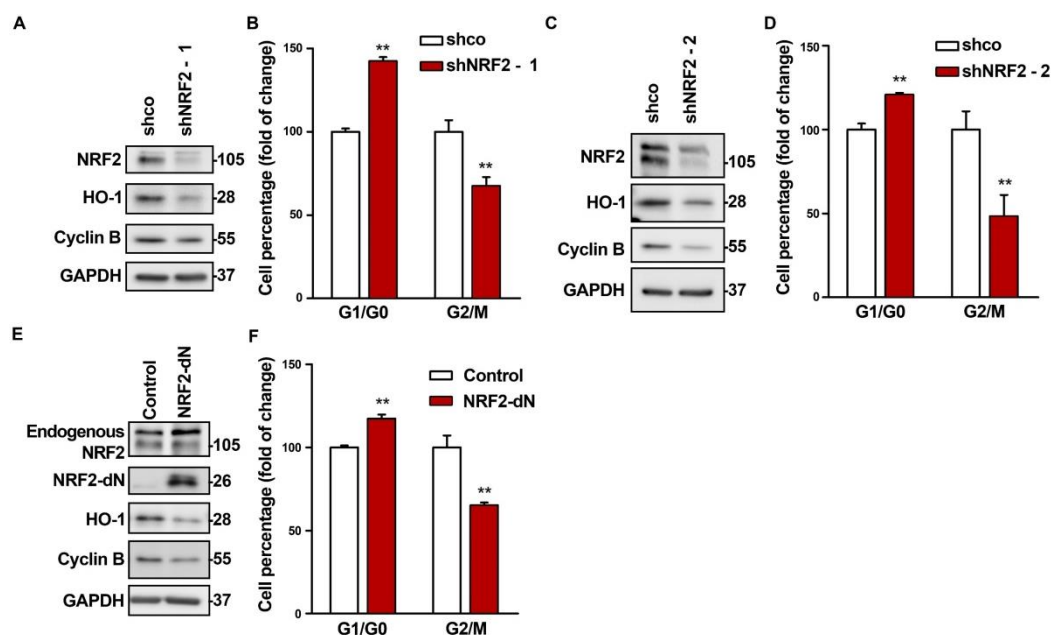

**Figure S2.** NRF2 downregulation increases G1 cell numbers. U-87 MG cells were transduced with different lentiviral vectors (A,B) Knockdown of NRF2 with lentiviral vectors containing control (shco) or shNRF2-1. (C,D) Knockdown of NRF2 with lentiviral vector containing control (shco) or

shNRF2-2. For A and C, representative immunoblots of NRF2, HO-1, Cyclin B, and GAPDH as a loading control. For B and D, flow cytometry analysis of G1 and G2/M phases in Hoechst-stained cells. Data are presented as mean  $\pm$  S.D. \*\*  $p \leq 0.01$  according to a Student's t-test ( $n = 3$ ). **(E,F)** U-373 MG glioblastomas cells were transduced with lentiviral vectors containing NRF2 dominant-negative mutant (NRF2-dN) or an empty vector (Control). **(E)** Representative immunoblots of NRF2, HO-1, Cyclin B, and GAPDH as a loading control. **(F)** Flow cytometry analysis of G1 and G2/M phases in Hoechst-stained cells. Data are presented as mean  $\pm$  S.D. \*\*  $p \leq 0.01$  according to a Student's t-test ( $n = 3$ ).
